# Supplementary material for: Venetoclax or Ruxolitinib in Pre-Transplant Conditioning Lowers the Engraftment Barrier by Different Mechanisms in Allogeneic Stem Cell Transplant Recipients
Source: PubMed Central journal article supplement (PMC8498041; doi:10.3389/fimmu.2021.749094), 2021-09-24

A

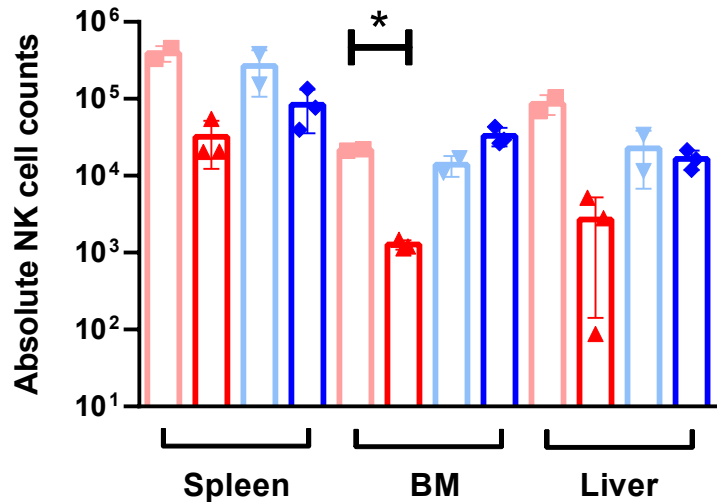

B

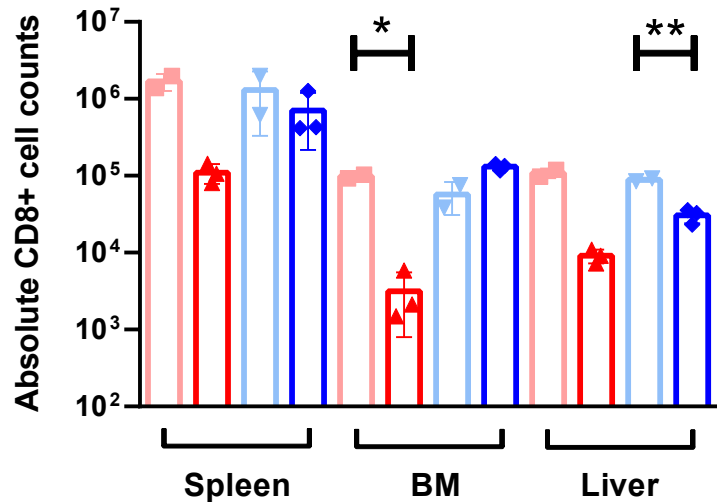

Supplement: DataSheet_2.pdf [file DataSheet_2.pdf]
